# Supplementary material
Source: MDPI journal article supplement (https://www.mdpi.com/1999-4907/11/11/1183)
Supplement: s1 [file s1]

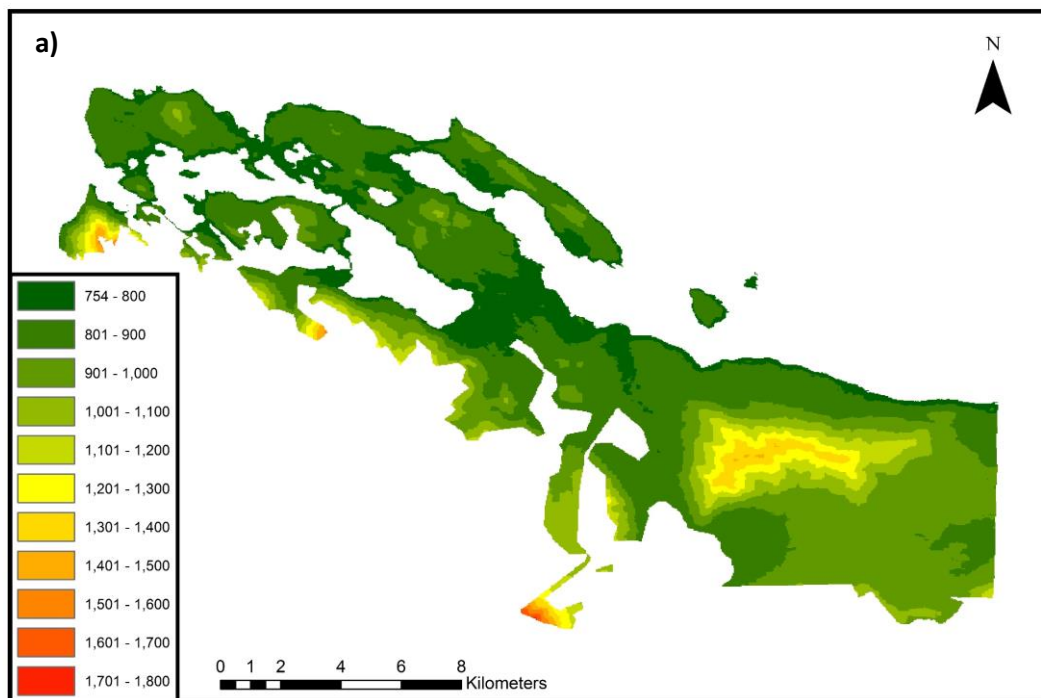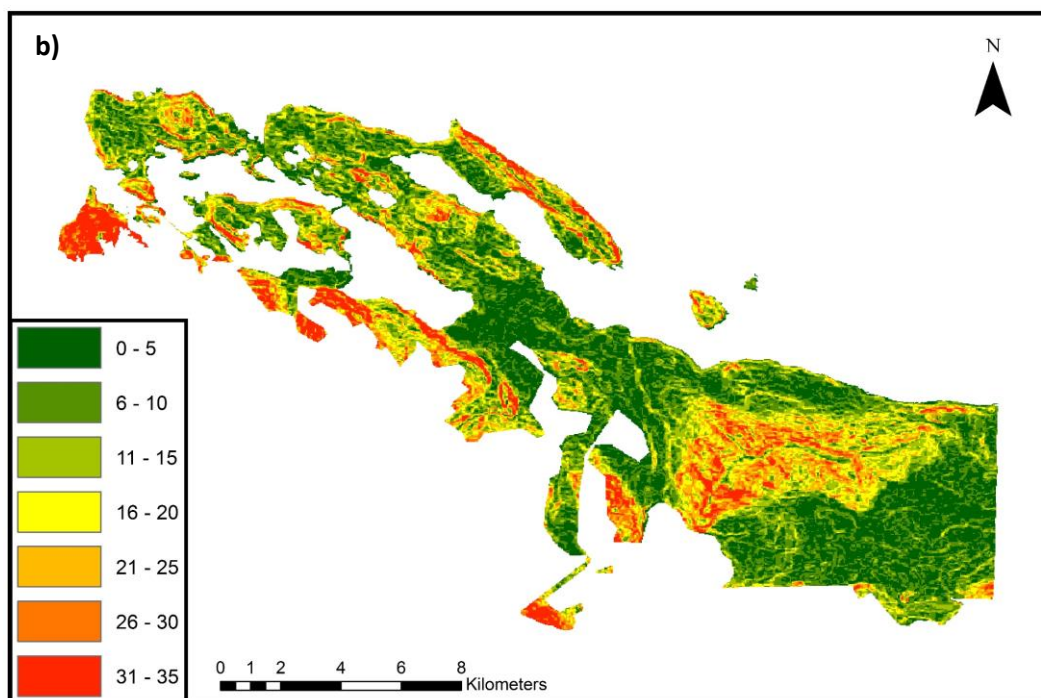

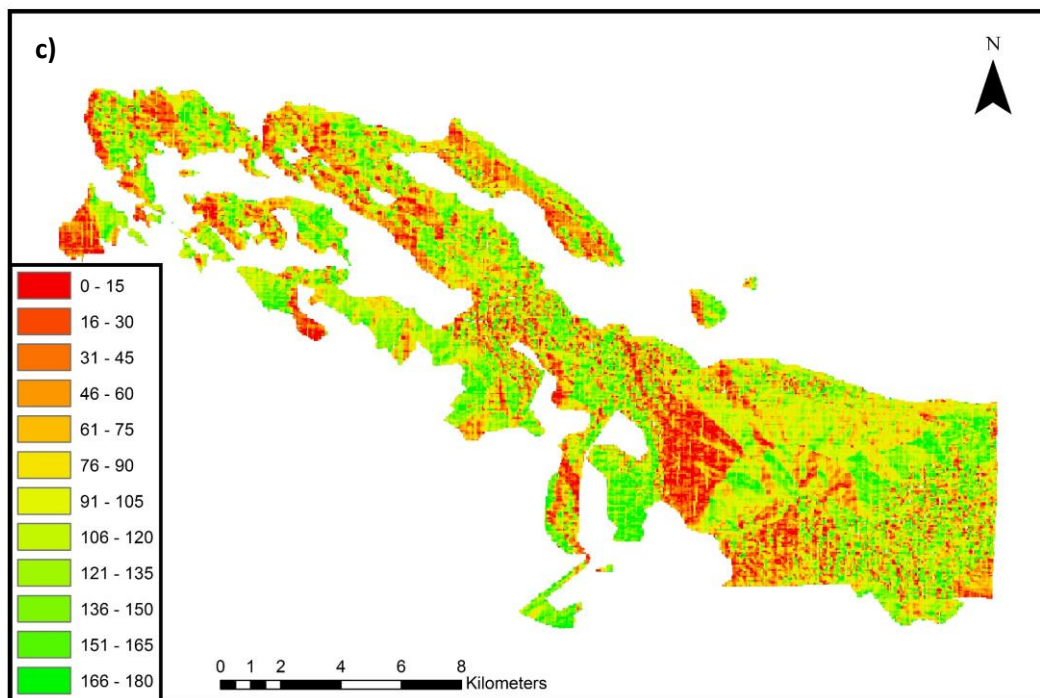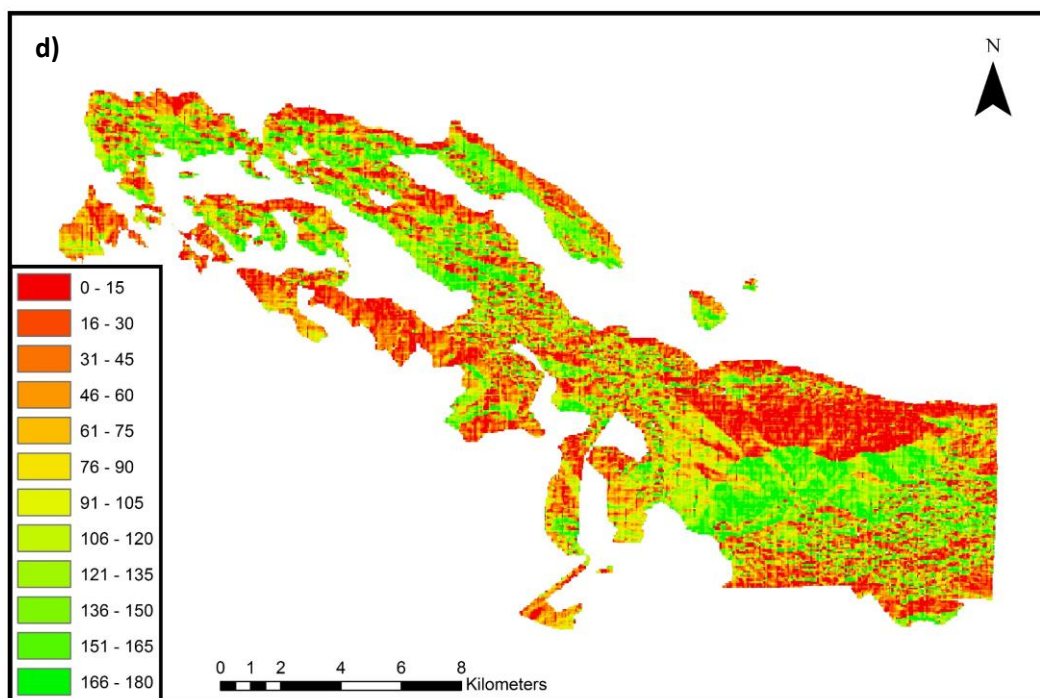

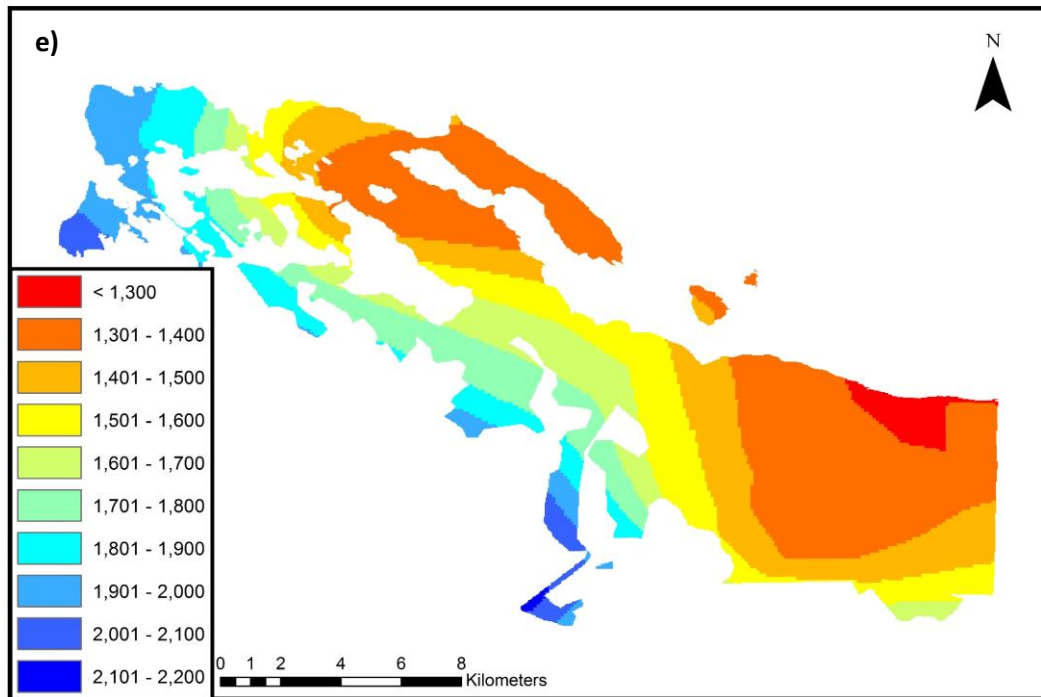

Figure S1. Environmental gradient in the study area. Figures show ranges of: a) altitude (m. a.s.l.), b) slope (%), c) relative east aspect ( $^{\circ}$ ), d) relative south aspect ( $^{\circ}$ ) and e) mean annual precipitation (m. a.s.l.)
